# Supplementary material
Source: PubMed Central journal article supplement (PMC9114517)
Supplement: mmc1.pdf [file mmc1.pdf]

## **Supplemental information**

### **Evidence showing lipotoxicity worsens outcomes in covid-19 patients and insights about the underlying mechanisms**

**Rodrigo Cartin-Ceba, Biswajit Khatua, Bara El-Kurdi, Shubham Trivedi, Sergiy Kostenko, Zaid Imam, Ryan Smith, Christine Snozek, Sarah Navina, Vijeta Sharma, Bryce McFayden, Filip Ionescu, Eugene Stollow, Sylvia Keiser, Aziz Tejani, Allison Harrington, Phillip Acosta, Saatchi Kuwelker, Juan Echavarria, Girish B. Nair, Adam Bataineh, and Vijay P. Singh**

## SUPPLEMENTARY MATERIAL

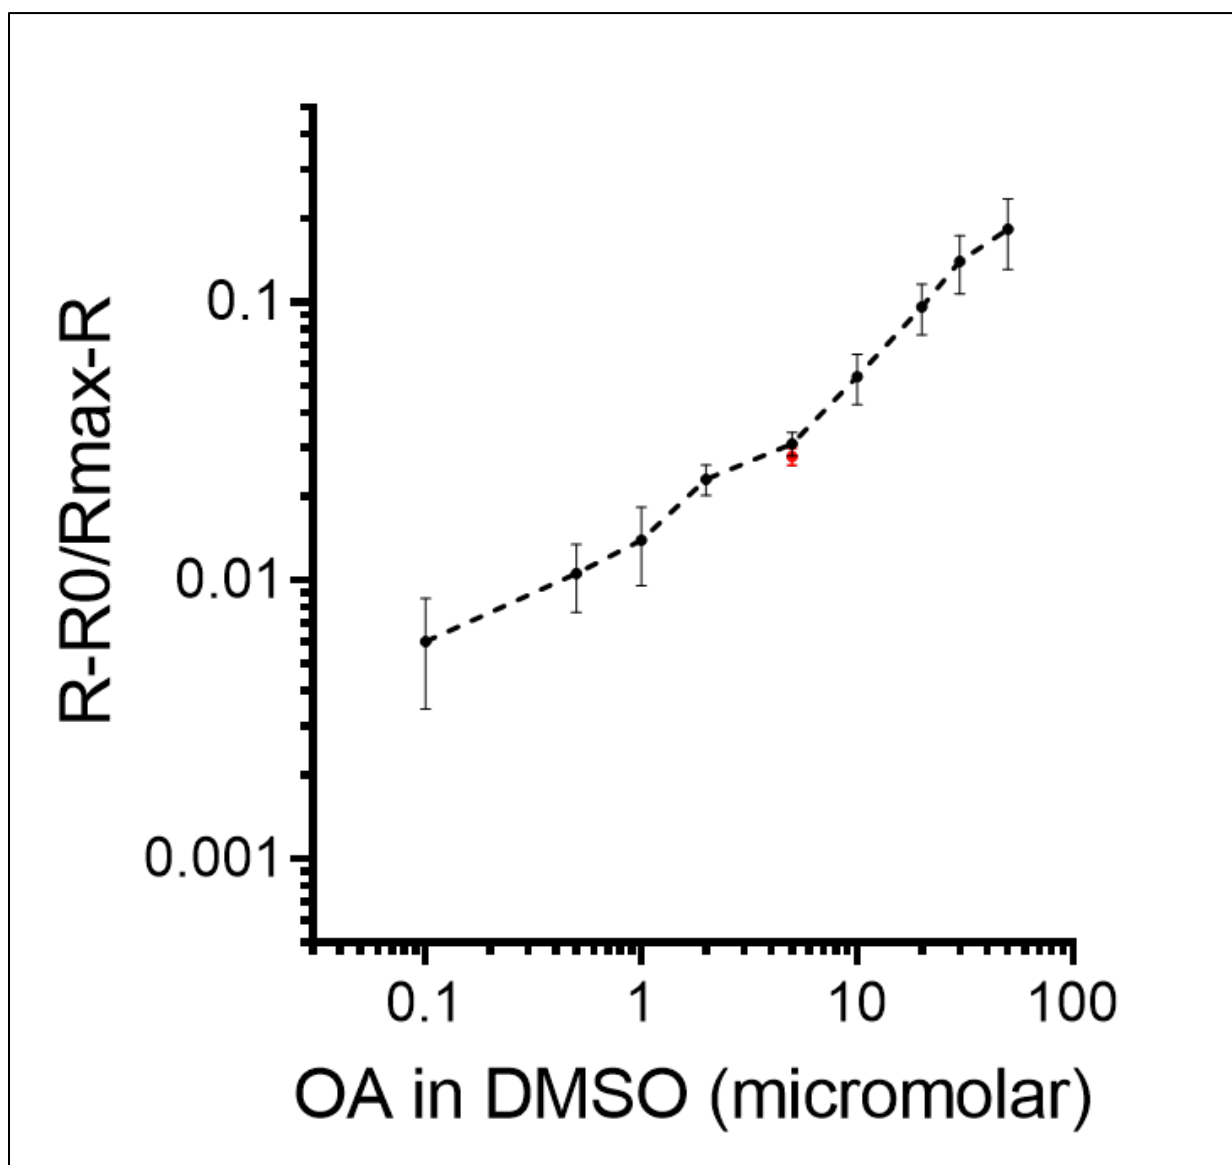

**Figure S1: Calibration curve for ADIFAB reagent using oleic acid standards in dimethyl sulfoxide (DMSO), related to measurement of unbound fatty acids using ADIFAB reagent in STAR methods:** Calibration curves for oleic acid standards in DMSO showing the results of 9 different experiments in black dots and the dashed line connects the means for each concentration. The red dot shows the value of the unbound oleic acid standard supplied by the manufacturer. Error bars depict standard error of mean.

Albumin values (BCA assay) before and after albumin depletion using 2 columns of the Pierce™ Albumin depletion kit

|   | 1     | 2     | 3     | 4     | 5     | 6     | 7     | 8     | 9     |
|---|-------|-------|-------|-------|-------|-------|-------|-------|-------|
| A | 0.286 | 0.289 | 0.274 | 0.263 | 0.150 | 0.152 | 0.154 | 0.154 | 0.263 |
| B | 0.274 | 0.237 | 0.291 | 0.276 | 0.147 | 0.145 | 0.146 | 0.149 | 0.264 |
| C | 0.273 | 0.296 | 0.242 | 0.259 | 0.141 | 0.147 | 0.147 | 0.148 | 0.269 |
| D | 0.314 | 0.303 | 0.233 | 0.268 | 0.145 | 0.149 | 0.142 | 0.148 |       |
| E | 0.284 | 0.262 | 0.267 | 0.257 | 0.151 | 0.149 | 0.147 | 0.148 |       |
| F | 0.269 | 0.293 | 0.280 | 0.245 | 0.150 | 0.147 | 0.159 | 0.147 |       |
| G | 0.295 | 0.290 | 0.281 | 0.160 | 0.148 | 0.150 | 0.148 | 0.177 |       |
| H | 0.260 | 0.270 | 0.273 | 0.154 | 0.146 | 0.147 | 0.152 | 0.162 |       |

Image of plate

| Sample #s | Before albumin depletion |    |    |       | After albumin depletion |    |    |       |           |
|-----------|--------------------------|----|----|-------|-------------------------|----|----|-------|-----------|
| A         | 4                        | 24 | 48 | 22    | 4                       | 24 | 48 | 22    | 4g/dl BSA |
| B         | 6                        | 26 | 50 | 28    | 6                       | 26 | 50 | 28    | 4g/dl BSA |
| C         | 8                        | 32 | 52 | 30    | 8                       | 32 | 52 | 30    | 4g/dl BSA |
| D         | 12                       | 38 | 54 | 34    | 12                      | 38 | 54 | 34    |           |
| E         | 14                       | 40 | 56 | 36    | 14                      | 40 | 56 | 36    |           |
| F         | 16                       | 42 | 58 | 60    | 16                      | 42 | 58 | 60    |           |
| G         | 18                       | 44 | 2  | Blank | 18                      | 44 | 2  | Blank |           |
| H         | 20                       | 46 | 10 | Blank | 20                      | 46 | 10 | Blank |           |

| Absorbance minus blank | Minus Blank |       |        |        |        |        |        |       |
|------------------------|-------------|-------|--------|--------|--------|--------|--------|-------|
| 0.127                  | 0.130       | 0.115 | 0.104  | -0.009 | -0.007 | -0.005 | -0.005 | 0.104 |
| 0.115                  | 0.078       | 0.132 | 0.117  | -0.012 | -0.014 | -0.013 | -0.010 | 0.105 |
| 0.114                  | 0.137       | 0.083 | 0.100  | -0.018 | -0.012 | -0.012 | -0.011 | 0.110 |
| 0.155                  | 0.144       | 0.074 | 0.109  | -0.014 | -0.010 | -0.017 | -0.011 |       |
| 0.125                  | 0.103       | 0.108 | 0.098  | -0.008 | -0.010 | -0.012 | -0.011 |       |
| 0.110                  | 0.134       | 0.121 | 0.086  | -0.009 | -0.012 | 0.000  | -0.012 |       |
| 0.136                  | 0.131       | 0.122 | 0.001  | -0.011 | -0.009 | -0.011 | 0.018  |       |
| 0.101                  | 0.111       | 0.114 | -0.005 | -0.013 | -0.012 | -0.007 | 0.003  |       |

| Albumin Conc. | Albumin(g/dl) |      |      |       |       |       |       |
|---------------|---------------|------|------|-------|-------|-------|-------|
| 4.78          | 4.91          | 4.35 | 3.91 | -0.35 | -0.25 | -0.20 | -0.19 |
| 4.33          | 2.95          | 4.98 | 4.41 | -0.43 | -0.52 | -0.48 | -0.37 |
| 4.32          | 5.16          | 3.14 | 3.77 | -0.67 | -0.45 | -0.47 | -0.40 |
| 5.84          | 5.44          | 2.80 | 4.10 | -0.52 | -0.38 | -0.66 | -0.41 |
| 4.70          | 3.89          | 4.09 | 3.70 | -0.30 | -0.38 | -0.45 | -0.41 |
| 4.15          | 5.05          | 4.58 | 3.26 | -0.33 | -0.44 | 0.00  | -0.45 |
| 5.13          | 4.96          | 4.61 |      | -0.40 | -0.34 | -0.43 |       |
| 3.81          | 4.17          | 4.31 |      | -0.49 | -0.44 | -0.27 |       |

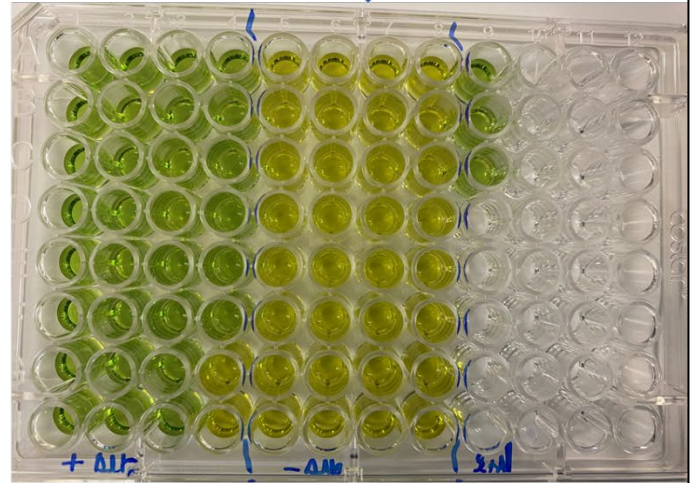

**Figure S2: Results of serum dealbumination: Related to quantification of unbound fatty acids using gas-chromatography mass spectrometry in STAR methods** Image of the excel (left side) showing measured absorbances and calculated albumin concentrations (Conc.) along with the plate used for the assay (right side). One the left side of each excel table is the title of what the table depicts. Columns

**TABLE S1: Clinical characteristics comparing COVID versus non-COVID, non-septic shock patients admitted to the ICU related to table 2.**

| Variable                                              | Non-COVID, Non-septic shock (49) | COVID-19 (39)    | P value  |
|-------------------------------------------------------|----------------------------------|------------------|----------|
| Age in years, median (IQR)                            | 67 (57-75)                       | 55 (44-64)       | < 0.0001 |
| Female sex, n (%)                                     | 12 (24.5)                        | 17 (43.6)        | 0.07     |
| BMI in Kg/m <sup>2</sup> , median (IQR)               | 27.8 (25.1-32.5)                 | 30.2 (26.8-35.8) | 0.04     |
| Race, n (%)                                           |                                  |                  | < 0.0001 |
| Caucasian                                             | 42 (85.7)                        | 11 (28.2)        |          |
| Hispanic                                              | 4 (8.3)                          | 8 (20.5)         |          |
| Asian                                                 | 2 (4)                            | 2 (5.1)          |          |
| African American                                      | 1 (2)                            | 1 (2.6)          |          |
| Native American                                       | 0 (0)                            | 17 (43.6)        |          |
| Diabetes Mellitus, n (%)                              | 12 (24.5)                        | 19 (48.7)        | 0.02     |
| Hypertension, n (%)                                   | 25 (51)                          | 16 (41)          | 0.39     |
| Coronary artery disease, n (%)                        | 23 (47)                          | 5 (12.8)         | 0.001    |
| Cancer, n (%)                                         | 5 (10)                           | 2 (5)            | 0.45     |
| Cerebrovascular disease, n (%)                        | 4 (8)                            | 3 (7.7)          | 0.99     |
| Cirrhosis, n (%)                                      | 4 (8)                            | 0 (0)            | 0.12     |
| Chronic kidney disease, n (%)                         | 7 (14)                           | 3 (7.7)          | 0.50     |
| Immunosuppression, n (%)                              | 2 (4)                            | 6 (15)           | 0.13     |
| Pre-ICU days, median (IQR)                            | 0 (0-2)                          | 1 (1-3)          | 0.0003   |
| ICU source, n (%)                                     |                                  |                  | < 0.0001 |
| Emergency Room                                        | 8 (16)                           | 3 (7.7)          |          |
| Hospital Ward                                         | 3 (6)                            | 21 (54)          |          |
| Operating Room                                        | 36 (73.5)                        | 0 (0)            |          |
| Outside hospital                                      | 2 (4)                            | 15 (38.5)        |          |
| Temperature in °Celsius, median (IQR)                 | 37.4 (35.9-38.3)                 | 37.5 (37-38.2)   | 0.13     |
| Median arterial pressure in mmHg, median (IQR)        | 61 (58-66)                       | 69 (62-77)       | 0.005    |
| Heart rate, median (IQR)                              | 94 (84-103)                      | 98 (86-108)      | 0.30     |
| Respiratory rate, median (IQR)                        | 22 (19-25)                       | 29 (24-32)       | < 0.0001 |
| Fluids in first 24 hours, median (IQR)                | 5123 (2923-6183)                 | 2001 (1319-2638) | < 0.0001 |
| Urine output, first 24 h, median (IQR)                | 1821 (1392-2537)                 | 1475 (920-2265)  | 0.15     |
| Fluid balance 24 hours (mL), median (IQR)             | 3185 (621-4330)                  | 169 (-765-1071)  | < 0.0001 |
| Glasgow Coma Scale, median (IQR)                      | 12 (9-15)                        | 15 (15-15)       | 0.001    |
| Acute physiologic score, median (IQR)                 | 39 (30-48)                       | 38 (25-62)       | 0.97     |
| APACHE IV, median (IQR)                               | 52 (39-63)                       | 51 (34-69)       | 0.57     |
| Predicted mortality, median (IQR)                     | 2.8 (1.1-9.4)                    | 14.7 (7.3-37.6)  | < 0.0001 |
| Vasopressors on Day 1                                 | 27 (55)                          | 17 (44)          | 0.39     |
| SOFA score Day 1, median (IQR)                        | 7 (5-9)                          | 5 (4-8)          | 0.26     |
| SOFA score Day 2, median (IQR)                        | 5 (3-7)                          | 5 (3-8)          | 0.72     |
| SOFA score Day 3, median (IQR)                        | 5 (3-7)                          | 5 (3-8)          | 0.69     |
| SOFA score Day 4, median (IQR)                        | 4 (3-9)                          | 6 (3-9)          | 0.39     |
| SOFA score Day 5, median (IQR)                        | 4 (2-11)                         | 6 (4-10)         | 0.45     |
| SOFA score Day 6, median (IQR)                        | 7 (3-12)                         | 6 (4-9)          | 0.84     |
| SOFA score Day 7, median (IQR)                        | 10 (3-13)                        | 7 (4-10)         | 0.45     |
| <b>Baseline laboratory results</b>                    |                                  |                  |          |
| White blood count (x10 <sup>9</sup> /L), median (IQR) | 9.5 (7.5-12)                     | 9.4 (5.2-15)     | 0.69     |

|                                               |                 |                   |          |
|-----------------------------------------------|-----------------|-------------------|----------|
| Platelets (x10 <sup>9</sup> /L), median (IQR) | 127 (95-213)    | 226 (176-284)     | < 0.0001 |
| Sodium (mmol/L), median (IQR)                 | 141 (138-142)   | 136 (133-138)     | < 0.0001 |
| Creatinine (mg/dL), median (IQR)              | 1.02 (0.76-1.2) | 1.06 (0.81-1.68)  | 0.32     |
| Blood urea nitrogen (mg/dL), median (IQR)     | 15 (12-21)      | 18 (12-35)        | 0.26     |
| Glucose (mg/dL), median (IQR)                 | 157 (132-177)   | 134 (107-210)     | 0.38     |
| pH, median (IQR)                              | 7.4 (7.35-7.43) | 7.39 (7.31-7.44)  | 0.84     |
| Lactate (mmol/L), median (IQR)                | 1.4 (1.1-2.3)   | 1.2 (1.1-1.7)     | 0.12     |
| Bilirubin (mg/dL), median (IQR)               | 1 (0.5-1)       | 0.4 (0.3-0.6)     | < 0.0001 |
| Hematocrit (%), median (IQR)                  | 29 (27-34)      | 38 (33-41)        | < 0.0001 |
| Lipase (U/L), median (IQR)                    | 21.5 (11-45.7)  | 73.1 (42.2-121.9) | < 0.0001 |
| Albumin (g/dL), median (IQR)                  | 4 (3.8-4.3)     | 3.2 (2.9-3.4)     | < 0.0001 |
| Calcium (mg/dL), median (IQR)                 | 8.7 (8.1-9.3)   | 8 (07.4-8.3)      | < 0.0001 |
| Ionized Calcium (mg/dL), median (IQR)         | 4.7 (4.3-4.9)   | 4.3 (4.1-4.5)     | 0.001    |

IQR: interquartile range, n: number, BMI: body mass index, ICU: intensive care unit, APACHE: Acute Physiology and Chronic Health Evaluation, SOFA: Sequential Organ Failure Assessment.

**TABLE S2: Clinical characteristics and outcomes of 39 patients with COVID-19 admitted to the ICU comparing Caucasians versus non-Caucasian patients, related to table 2.**

| Variable                                      | Caucasian (11)   | Non-Caucasian (28) | P value |
|-----------------------------------------------|------------------|--------------------|---------|
| Age in years, median (IQR)                    | 59 (52-70)       | 49 (44-63)         | 0.15    |
| Female sex, n (%)                             | 5 (45)           | 12 (43)            | 0.99    |
| BMI in Kg/m <sup>2</sup> , median (IQR)       | 31 (27-34)       | 30 (26-36)         | 0.82    |
| Diabetes Mellitus, n (%)                      | 6 (54)           | 13 (46)            | 0.73    |
| Hypertension, n (%)                           | 5 (45)           | 11 (39)            | 0.74    |
| APACHE IV, median (IQR)                       | 51 (34-66)       | 50 (33-74)         | 0.77    |
| Predicted mortality, median (IQR)             | 14.7 (7-25)      | 14 (7-44)          | 0.85    |
| Vasopressors on Day 1                         | 4 (36)           | 13 (46)            | 0.72    |
| 28 day Mortality, n (%)                       | 2 (18)           | 3 (11)             | 0.60    |
| Venous thromboembolic events, n (%)           | 2 (18)           | 8 (28)             | 0.69    |
| RRT, n (%)                                    | 2 (18)           | 7 (25)             | 0.99    |
| MOF development, n (%)                        | 5 (45)           | 18 (64)            | 0.3     |
| <b>Baseline laboratory results</b>            |                  |                    |         |
| Lactate (mmol/L), median (IQR)                | 1.4 (1-1.9)      | 1.3 (1.1-1.8)      | 0.74    |
| IL-6 (pg/ml), median (IQR)                    | 355 (111-641)    | 363 (59-666)       | 0.70    |
| TNF $\alpha$ (pg/ml), median (IQR)            | 32.7 (28.3-63.9) | 41 (26.5-57.3)     | 0.98    |
| Lipase (U/L), median (IQR)                    | 109 (57-212)     | 65 (36-98)         | 0.07    |
| Albumin (g/dL), median (IQR)                  | 3.3 (3-3.5)      | 3.1 (2.5-3.4)      | 0.16    |
| Calcium (mg/dL), median (IQR)                 | 8.2 (7.4-8.4)    | 8 (7.4-8.2)        | 0.61    |
| Ionized Calcium (mg/dL), median (IQR)         | 4.3 (4-4.4)      | 4.3 (4.1-4.6)      | 0.74    |
| Unbound FA, median ( $\mu$ M)(IQR)            | 5.9 (4.3-10.9)   | 4.3 (2.3-7.8)      | 0.24    |
| Linoleic acid (C18:2), median ( $\mu$ M)(IQR) | 140 (81-191)     | 106 (72-146)       | 0.26    |

IQR: interquartile range, n: number, BMI: body mass index, ICU: intensive care unit, APACHE: Acute Physiology and Chronic Health Evaluation, RRT: renal replacement therapy, MOF: multiorgan failure

**TABLE S3: Clinical characteristics and outcomes of 39 patients with COVID-19 admitted to the ICU comparing Native-Americans (NA) versus non-NA, related to table 2**

| Variable                                      | Native-American (17) | Non-Native-American (22) | P value     |
|-----------------------------------------------|----------------------|--------------------------|-------------|
| Age in years, median (IQR)                    | 61 (48-67)           | 51 (43-62)               | 0.19        |
| Female sex, n (%)                             | 7 (41)               | 10 (45)                  | 0.99        |
| BMI in Kg/m <sup>2</sup> , median (IQR)       | 29.4 (26.6-34.8)     | 31.3 (26.7-37.9)         | 0.55        |
| Diabetes Mellitus, n (%)                      | 10 (59)              | 9 (41)                   | 0.34        |
| Hypertension, n (%)                           | 8 (47)               | 8 (36)                   | 0.45        |
| APACHE IV, median (IQR)                       | 41 (31-63)           | 54 (35-77)               | 0.32        |
| Predicted mortality, median (IQR)             | 11 (6-33)            | 18 (9-40)                | 0.32        |
| Vasopressors on Day 1                         | 6 (35)               | 11 (50)                  | 0.51        |
| 28 day Mortality, n (%)                       | 3 (18)               | 2 (9)                    | 0.63        |
| Venous thromboembolic events, n (%)           | 5 (29)               | 5 (23)                   | 0.72        |
| RRT, n (%)                                    | 4 (24)               | 5 (23)                   | 0.99        |
| MOF development, n (%)                        | 11 (65)              | 12 (55)                  | 0.74        |
| <b>Baseline laboratory results</b>            |                      |                          |             |
| Lactate (mmol/L), median (IQR)                | 1.2 (1.1-1.5)        | 1.7 (1-1.9)              | 0.41        |
| IL-6 (pg/ml), median (IQR)                    | 367 (206-627)        | 322 (51-717)             | 0.47        |
| TNF $\alpha$ (pg/ml), median (IQR)            | 40.4 (27-55.7)       | 50.3 (28-66)             | 0.68        |
| Lipase (U/L), median (IQR)                    | 64 (34-93)           | 84 (48-185)              | 0.11        |
| Albumin (g/dL), median (IQR)                  | 3.1 (2.7-3.4)        | 3.2 (2.9-3.5)            | 0.52        |
| Calcium (mg/dL), median (IQR)                 | 8 (7.8-8.3)          | 8 (7.4-8.3)              | 0.56        |
| Ionized Calcium (mg/dL), median (IQR)         | 4.5 (4.3-4.6)        | 4.1 (4-4.4)              | <b>0.02</b> |
| Unbound FA, median ( $\mu$ M)(IQR)            | 4.2 (2.7-6.8)        | 5.7 (1.7-10.6)           | 0.42        |
| Linoleic acid (C18:2), median ( $\mu$ M)(IQR) | 108 (80-139)         | 117 (76-195)             | 0.42        |

IQR: interquartile range, n: number, BMI: body mass index, ICU: intensive care unit, APACHE: Acute Physiology and Chronic Health Evaluation, RRT: renal replacement therapy, MOF: multiorgan failure

**TABLE S4: Fatty acid profile (in micromolars) of ICU patients comparing COVID versus non-COVID patients without septic shock as well as experimental animal data comparing control mice versus mice treated with linoleic acid (LA), related to table 3**

| Fatty acids ( $\mu$ M unless specified) | Non-COVID, Non-Septic shock (49) | COVID-19 (39)      | P value | Control mice     | LA mice            | P value |
|-----------------------------------------|----------------------------------|--------------------|---------|------------------|--------------------|---------|
| Myristic acid                           | 7.6 (5.7-10.7)                   | 6.7 (5.3-10)       | 0.2     | 5.9 (4.9-7.8)    | 6.7 (6.1-8.3)      | 0.94    |
| Palmitic acid                           | 136 (116-178)                    | 151 (116-217)      | 0.23    | 159 (148-200)    | 177(156-182)       | 0.23    |
| Palmitoleic acid                        | 14.8 (8.4-22.4)                  | 16.8 (9.7-24.1)    | 0.38    | 16.9 (9.1-25.9)  | 20.4 (18.1-22.9)   | 0.62    |
| Stearic acid                            | 51.3 (38.4-58.7)                 | 47.4 (38.4-56.1)   | 0.51    | 47.8 (38.3-57.9) | 33.1 (29.5-42.0)   | 0.14    |
| Oleic acid                              | 226 (173-281)                    | 243 (190-310)      | 0.25    | 75.1 (65.0-83.5) | 99.0 (75.5-123)    | 0.14    |
| Linoleic acid                           | 82.7 (63.6-108.7)                | 112.8 (76.2-148.5) | 0.002   | 119.0 (92.7-162) | 442 (229-536) *    | 0.001   |
| Arachidonic acid                        | 3.7 (2.7-5.4)                    | 5.3 (3.7-6.2)      | 0.009   | 5.9 (4.6-6.3)    | 8.7 (7.8-9.1) *    | 0.001   |
| %UFA                                    | 61.5 (60-64)                     | 63.8 (62.5-66.3)   | 0.003   | 48.2 (40.1-67.6) | 69.0 (59.3-73.6) * | <0.001  |
| Unbound FA                              | 3.45 (2.48-4.67)                 | 4.75 (2.4-8.4)     | 0.04    | 5.4 (4.5-5.7)    | 19.4 (16.0-21.0)*  | <0.001  |

UFA: unsaturated fatty acids, FA: fatty acid \* Significantly different from control group.

**Table S5: Clinical characteristics of 116 patients admitted to the ICU comparing hospital survivors versus non survivors. Related to table 2**

| Variable                                              | Survivors (103)  | Non-survivors (13) | P value |
|-------------------------------------------------------|------------------|--------------------|---------|
| Age in years, median (IQR)                            | 64 (50-75)       | 65 (51-75)         | 0.70    |
| Female sex, n (%)                                     | 36 (35)          | 4 (31)             | 0.99    |
| BMI in Kg/m <sup>2</sup> , median (IQR)               | 28.7 (25.1-33.5) | 31.4 (24.9-35.1)   | 0.45    |
| Race, n (%)                                           |                  |                    | 0.51    |
| Caucasian                                             | 70 (68)          | 10 (77)            |         |
| Hispanic                                              | 13 (12)          | 0                  |         |
| Asian                                                 | 4 (4)            | 0                  |         |
| African American                                      | 2 (2)            | 0                  |         |
| Native American                                       | 14 (14)          | 3 (23)             |         |
| Diabetes Mellitus, n (%)                              | 38 (37)          | 8 (61)             | 0.13    |
| Hypertension, n (%)                                   | 44 (43)          | 5 (38)             | 0.99    |
| Coronary artery disease, n (%)                        | 29 (28)          | 4 (31)             | 0.99    |
| Cancer, n (%)                                         | 12 (12)          | 2 (15)             | 0.65    |
| Cerebrovascular disease, n (%)                        | 8 (8)            | 1 (8)              | 0.99    |
| Cirrhosis, n (%)                                      | 4 (4)            | 3 (23)             | 0.03    |
| Chronic kidney disease, n (%)                         | 14 (14)          | 3 (23)             | 0.40    |
| Immunosuppression, n (%)                              | 12 (12)          | 1 (8)              | 0.99    |
| Pre-ICU days, median (IQR)                            | 0 (0-2)          | 1 (0-2)            | 0.53    |
| ICU source, n (%)                                     |                  |                    | 0.04    |
| Emergency Room                                        | 21 (21)          | 5 (38)             |         |
| Hospital Ward                                         | 26 (25)          | 6 (46)             |         |
| Operating Room                                        | 38 (37)          | 0 (0)              |         |
| Outside hospital                                      | 18 (17)          | 2 (15)             |         |
| Temperature in °Celsius, median (IQR)                 | 37.5 (36.8-38.4) | 36.8 (35.4-38.4)   | 0.26    |
| Median arterial pressure in mmHg, median (IQR)        | 62 (58-70)       | 60 (56-70)         | 0.54    |
| Heart rate, median (IQR)                              | 97 (86-107)      | 111 (99-121)       | 0.009   |
| Respiratory rate, median (IQR)                        | 24 (20-29)       | 28 (20-31)         | 0.43    |
| Fluids in first 24 hours, median (IQR)                | 2849 (1932-5275) | 2438 (1612-4045)   | 0.47    |
| Urine output, first 24 h, median (IQR)                | 1787 (1200-2425) | 295 (30-2062)      | 0.02    |
| Fluid balance 24 hours (mL), median (IQR)             | 1189 (-204-3299) | 1554 (510-3280)    | 0.53    |
| Glasgow Coma Scale, median (IQR)                      | 15 (12-15)       | 14 (4-15)          | 0.07    |
| Acute physiologic score, median (IQR)                 | 42 (30-55)       | 75 (49-96)         | 0.002   |
| APACHE IV, median (IQR)                               | 55 (38-71)       | 96 (63-106)        | 0.002   |
| Predicted mortality, median (IQR)                     | 9.8 (2.4-23.5)   | 34 (21.2-62.8)     | 0.0004  |
| Vasopressors on Day 1                                 | 60 (58)          | 9 (69)             | 0.55    |
| SOFA score Day 1, median (IQR)                        | 7 (5-9)          | 11 (4-13)          | 0.04    |
| SOFA score Day 2, median (IQR)                        | 5 (3-8)          | 11 (6-14)          | 0.0005  |
| SOFA score Day 3, median (IQR)                        | 5 (3-7)          | 10 (8-13)          | 0.0004  |
| SOFA score Day 4, median (IQR)                        | 4 (3-9)          | 9 (7-12)           | 0.006   |
| SOFA score Day 5, median (IQR)                        | 5 (3-10)         | 9 (7-13)           | 0.02    |
| SOFA score Day 6, median (IQR)                        | 5 (3-10)         | 9 (7-13)           | 0.04    |
| SOFA score Day 7, median (IQR)                        | 6 (4-10)         | 8 (8-12)           | 0.17    |
| <b>Baseline laboratory results</b>                    |                  |                    |         |
| White blood count (x10 <sup>9</sup> /L), median (IQR) | 9.8 (6.9-14.3)   | 12 (8.9-17.6)      | 0.22    |
| Platelets (x10 <sup>9</sup> /L), median (IQR)         | 171 (113-238)    | 165 (146-217)      | 0.73    |

|                                           |                  |                  |       |
|-------------------------------------------|------------------|------------------|-------|
| Sodium (mmol/L), median (IQR)             | 138 (135-141)    | 135 (129-139)    | 0.04  |
| Creatinine (mg/dL), median (IQR)          | 1.07 (0.79-1.66) | 1.88 (1.02-3.02) | 0.008 |
| Blood urea nitrogen (mg/dL), median (IQR) | 18 (12-26)       | 29 (17-48)       | 0.01  |
| Glucose (mg/dL), median (IQR)             | 151 (119-181)    | 185 (107-291)    | 0.16  |
| pH, median (IQR)                          | 7.4 (7.35-7.43)  | 7.34 (7.21-7.4)  | 0.04  |
| Lactate (mmol/L), median (IQR)            | 1.6 (1.1-2.8)    | 5.2 (1.6-8)      | 0.005 |
| Bilirubin (mg/dL), median (IQR)           | 0.7 (0.4-1)      | 1 (0.3-2.7)      | 0.25  |
| Hematocrit (%), median (IQR)              | 33 (28-38)       | 34 (27-37)       | 0.83  |
| Lipase (U/L), median (IQR)                | 35 (15-68)       | 19 (12-80)       | 0.59  |
| Albumin (g/dL), median (IQR)              | 3.5 (3.1-4)      | 3.3 (2.8-3.6)    | 0.11  |
| Calcium (mg/dL), median (IQR)             | 8.2 (7.8-8.7)    | 8.2 (7.4-8.8)    | 0.81  |
| Ionized Calcium (mg/dL), median (IQR)     | 4.5 (4.2-4.8)    | 4.2 (4-4.6)      | 0.06  |

IQR: interquartile range, n: number, BMI: body mass index, ICU: intensive care unit, APACHE: Acute Physiology and Chronic Health Evaluation, SOFA: Sequential Organ Failure Assessment.



**Table S6: Fatty acid profile (in micromolars) of 116 ICU patients comparing hospital survivors versus non survivors, related to table 3**

| Fatty acids ( $\mu\text{M}$ ) | Survivors (103)     | Non-survivors (13)  | P value |
|-------------------------------|---------------------|---------------------|---------|
| Myristic acid                 | 7.4 (5.7-10.6)      | 9.2 (6.3-15.5)      | 0.11    |
| Palmitic acid                 | 137 (114-187)       | 192 (115-269)       | 0.11    |
| Palmitoleic acid              | 15.8 (9.7-24.1)     | 20.1 (11.6-41.8)    | 0.16    |
| Stearic acid                  | 47.7 (37.2-55.3)    | 57.9 (46.5-79.9)    | 0.02    |
| Oleic acid                    | 225.9 (175-288)     | 358.9 (182.1-420.7) | 0.05    |
| Linoleic acid                 | 86.6 (66.3-114.6)   | 121.4 (90.2-153.9)  | 0.03    |
| Arachidonic acid              | 4.3 (3.3-5.5)       | 4.8 (3.7-7.1)       | 0.14    |
| UFA                           | 341.7 (260.2-450.6) | 529.4 (292-605)     | 0.04    |
| NEFA                          | 547.5 (434.3-698.9) | 787.3 (455.4-967.7) | 0.04    |
| SFA                           | 193.1 (160.5-251.2) | 260.7 (163.4-366.1) | 0.09    |
| Unbound FA                    | 3.8 (2.8-5.9)       | 6.2 (4.5-11.8)      | 0.02    |

UFA: unsaturated fatty acid, NEFA: non-esterified fatty acid, SFA: saturated fatty acid, FA: fatty acid

**Table S7: Outcomes and interventions of 116 patients comparing hospital survivors versus non survivors., related to table 2**

| Variable                                   | Survivors (103) | Non-survivors (13) | P value |
|--------------------------------------------|-----------------|--------------------|---------|
| Multiorgan failure, n (%)                  | 43 (42)         | 12 (92)            | 0.0006  |
| Renal Replacement Therapy, n (%)           | 12 (12)         | 5 (38)             | 0.02    |
| Mechanical ventilation, n (%)              | 58 (56)         | 6 (46)             | 0.56    |
| Veno-venous ECMO, n (%)                    | 8 (8)           | 4 (31)             | 0.03    |
| Mechanical ventilation days, median (IQR)  | 1 (0.3-9)       | 29.3 (8.1-54.8)    | 0.003   |
| ICU length of stay days, median (IQR)      | 3.1 (1.9-8.8)   | 4.9 (2.5-37.4)     | 0.06    |
| Hospital length of stay days, median (IQR) | 9.6 (6-21)      | 10.8 (3.6-38.5)    | 0.94    |
| DVT or PE events, n (%)                    | 12 (12)         | 1 (8)              | 0.99    |

ICU: intensive care unit, IQR: interquartile range, ECMO: extracorporeal membrane oxygenation, DVT: deep venous thrombosis, PE: pulmonary embolism

**Table S8: Cytokine profile of 116 ICU patients comparing hospital survivors versus non survivors, related to table 6**

| Variable               | Survivors (103)      | Non-survivors (13)    | P value |
|------------------------|----------------------|-----------------------|---------|
| GRO $\alpha$ (pg/ml)   | 26.3 (8.8-42.2)      | 33.3 (18.5-68.6)      | 0.1     |
| IL-1 $\beta$ (pg/ml)   | 6.4 (0-16.5)         | 11 (4.4-22.5)         | 0.08    |
| IL-1R $\alpha$ (pg/ml) | 9.7 (4.1-44.5)       | 160.3 (24.2-394.8)    | 0.0002  |
| IL-4 (pg/ml)           | 2.8 (0.4-7.2)        | 0.4 (0-5.6)           | 0.11    |
| IL-6 (pg/ml)           | 181.8 (50.6-453.6)   | 439.7 (131.1-854.4)   | 0.05    |
| IL-18 (pg/ml)          | 102 (38.2-150.6)     | 119.4 (53.4-216.7)    | 0.51    |
| IP-10 (pg/ml)          | 421.5 (149-2834.4)   | 1683.6 (212.4-3877.7) | 0.24    |
| MCP-1 (pg/ml)          | 740.9 (447.2-1336.4) | 1150.2 (519.6-1638.9) | 0.25    |

**Table S9: Calcium and Albumin levels in 3969 hospitalized COVID-19 patients comparing patients that survived versus those that did not survive hospitalization, related to table 4**

| Variable                  | Survivors (3398) |             | Non-survivors (571) |             | p-value      |
|---------------------------|------------------|-------------|---------------------|-------------|--------------|
|                           | Mean             | STD DEV     | Mean                | STD DEV     |              |
| Calcium (mg/dL) admission | <b>8.48</b>      | <b>0.69</b> | <b>8.26</b>         | <b>0.87</b> | <b>0.001</b> |
| Calcium day 1             | <b>8.21</b>      | <b>0.63</b> | <b>7.82</b>         | <b>0.80</b> | <b>0.001</b> |
| Calcium day 2             | <b>8.23</b>      | <b>0.65</b> | <b>7.73</b>         | <b>0.83</b> | <b>0.001</b> |
| Calcium day 3             | <b>8.23</b>      | <b>0.63</b> | <b>7.87</b>         | <b>0.75</b> | <b>0.001</b> |
| Calcium day 4             | <b>8.26</b>      | <b>0.63</b> | <b>7.91</b>         | <b>0.76</b> | <b>0.001</b> |
| Albumin (g/dL) admission  | <b>3.36</b>      | <b>0.56</b> | <b>3.08</b>         | <b>0.56</b> | <b>0.001</b> |
| Albumin day 1             | <b>3.00</b>      | <b>0.56</b> | <b>2.74</b>         | <b>0.50</b> | <b>0.001</b> |
| Albumin day 2             | <b>2.93</b>      | <b>0.55</b> | <b>2.62</b>         | <b>0.50</b> | <b>0.001</b> |
| Albumin day 3             | <b>2.82</b>      | <b>0.55</b> | <b>2.58</b>         | <b>0.50</b> | <b>0.001</b> |
| Albumin day 4             | <b>2.77</b>      | <b>0.55</b> | <b>2.50</b>         | <b>0.47</b> | <b>0.001</b> |

STD: standard deviation.

**Table S10: Univariate analysis evaluating the association of multiple variables and hospital mortality in 3969 hospitalized COVID-19 patients. Related to table 5.**

| Variable                            | OR    | CI 95%   |          | p value |
|-------------------------------------|-------|----------|----------|---------|
|                                     |       | CI lower | CI upper |         |
| Calcium (mg/dL) admission           | 0.646 | 0.567    | 0.737    | 0.001   |
| Calcium day 1                       | 0.397 | 0.328    | 0.48     | 0.001   |
| Calcium day 2                       | 0.326 | 0.265    | 0.4      | 0.001   |
| Calcium day 3                       | 0.432 | 0.354    | 0.528    | 0.001   |
| Calcium day 4                       | 0.454 | 0.355    | 0.58     | 0.001   |
| Alb (g/dL) admission                | 0.424 | 0.357    | 0.504    | 0.001   |
| Albumin day 1                       | 0.423 | 0.332    | 0.54     | 0.001   |
| Albumin day 2                       | 0.348 | 0.268    | 0.452    | 0.001   |
| Albumin day 3                       | 0.442 | 0.338    | 0.577    | 0.001   |
| Albumin day 4                       | 0.385 | 0.285    | 0.52     | 0.001   |
| Age (years)                         | 1.042 | 1.036    | 1.048    | 0.001   |
| Male sex                            | 1.343 | 1.124    | 1.606    | 0.001   |
| HTN                                 | 1.53  | 1.276    | 1.834    | 0.001   |
| DM                                  | 1.285 | 1.068    | 1.546    | 0.008   |
| CAD                                 | 1.725 | 1.353    | 2.2      | 0.001   |
| CKD                                 | 1.8   | 1.339    | 2.418    | 0.001   |
| CHF                                 | 1.95  | 1.473    | 2.582    | 0.001   |
| h/o Malignancy                      | 1.662 | 1.252    | 2.207    | 0.001   |
| BMI                                 | 0.985 | 0.975    | 0.996    | 0.008   |
| Immunosuppression                   | 0.783 | 0.354    | 1.732    | 0.546   |
| CRP (mg/dL) admission               | 1.001 | 1        | 1.002    | 0.109   |
| Creatinine (mg/dL) admission        | 1.033 | 1.002    | 1.064    | 0.035   |
| BUN (mg/dL) admission               | 1.018 | 1.015    | 1.021    | 0.001   |
| WBC (x10 <sup>9</sup> /L) admission | 1.004 | 0.983    | 1.026    | 0.706   |
| PLT (x10 <sup>9</sup> /L) admission | 0.999 | 0.998    | 1        | 0.123   |

OR: odds ratio, CI: Confidence Interval, BUN: blood urea nitrogen; CAD: coronary artery disease; CKD: chronic kidney disease; CHF: congestive heart failure; BMI: body mass index; CRP: C-reactive protein; BUN: blood urea nitrogen; WBC: white blood count; PLT: platelets.

**Table S11: Multivariate analysis evaluating the association of hospital mortality with serum levels of calcium on admission, related to table 5.**

| Variable             | OR    | 95% C.I. |       | P value |
|----------------------|-------|----------|-------|---------|
|                      |       | Lower    | Upper |         |
| Age                  | 1.04  | 1.032    | 0.001 | 0.001   |
| Male                 | 1.442 | 1.177    | 0.001 | 0.001   |
| HTN                  | 1.088 | 0.865    | 0.471 | 0.471   |
| DM                   | 1.05  | 0.839    | 0.669 | 0.669   |
| CAD                  | 1.015 | 0.763    | 0.92  | 0.92    |
| CKD                  | 1.246 | 0.868    | 0.234 | 0.234   |
| CHF                  | 1.171 | 0.842    | 0.347 | 0.347   |
| Malignancy           | 1.038 | 0.743    | 0.827 | 0.827   |
| BMI                  | 1.028 | 1.016    | 0.001 | 0.001   |
| Creatinine admission | 0.965 | 0.913    | 0.218 | 0.218   |
| BUN admission        | 1.014 | 1.009    | 0.001 | 0.001   |
| Calcium admission    | 1.002 | 0.957    | 0.948 | 0.948   |

OR: odds ratio, CI: Confidence Interval, BUN: blood urea nitrogen; HTN: hypertension, DM: diabetes mellitus, CAD: coronary artery disease; CKD: chronic kidney disease; CHF: congestive heart failure; BMI: body mass index; BUN: blood urea nitrogen.

**Table S12: Multivariate analysis evaluating the association of hospital mortality with serum levels of calcium on day 1. Related to table 5.**

| Variable             | OR    | 95% C.I. |       | P value |
|----------------------|-------|----------|-------|---------|
|                      |       | Lower    | Upper |         |
| Age                  | 1.033 | 1.023    | 1.043 | 0.001   |
| Male                 | 1.291 | 0.996    | 1.672 | 0.053   |
| HTN                  | 1.103 | 0.825    | 1.475 | 0.509   |
| DM                   | 1.1   | 0.828    | 1.459 | 0.511   |
| CAD                  | 0.812 | 0.553    | 1.19  | 0.285   |
| CKD                  | 1.189 | 0.751    | 1.883 | 0.46    |
| CHF                  | 1.385 | 0.908    | 2.113 | 0.131   |
| Malignancy           | 1.012 | 0.642    | 1.596 | 0.957   |
| BMI                  | 1.025 | 1.01     | 1.04  | 0.001   |
| Creatinine admission | 0.958 | 0.895    | 1.025 | 0.209   |
| BUN admission        | 1.012 | 1.006    | 1.018 | 0.001   |
| Calcium day 1        | 0.438 | 0.357    | 0.539 | 0.001   |

OR: odds ratio, CI: Confidence Interval, BUN: blood urea nitrogen; HTN: hypertension, DM: diabetes mellitus, CAD: coronary artery disease; CKD: chronic kidney disease; CHF: congestive heart failure; BMI: body mass index; BUN: blood urea nitrogen.

**Table S13: Multivariate analysis evaluating the association of hospital mortality with serum levels of calcium on day 2. Related to table 5.**

| Variable             | OR    | 95% C.I. |       | P value |
|----------------------|-------|----------|-------|---------|
|                      |       | Lower    | Upper |         |
| Age                  | 1.027 | 1.016    | 1.038 | 0.001   |
| Male                 | 1.518 | 1.149    | 2.005 | 0.003   |
| HTN                  | 1.128 | 0.823    | 1.544 | 0.454   |
| DM                   | 1.082 | 0.804    | 1.457 | 0.602   |
| CAD                  | 0.862 | 0.585    | 1.268 | 0.45    |
| CKD                  | 1.378 | 0.871    | 2.183 | 0.171   |
| CHF                  | 1.364 | 0.91     | 2.044 | 0.133   |
| Malignancy           | 1.007 | 0.627    | 1.619 | 0.976   |
| BMI                  | 1.033 | 1.018    | 1.049 | 0.001   |
| Creatinine admission | 0.953 | 0.884    | 1.028 | 0.212   |
| BUN admission        | 1.008 | 1.001    | 1.014 | 0.018   |
| Calcium day 2        | 0.348 | 0.279    | 0.435 | 0.001   |

OR: odds ratio, CI: Confidence Interval, BUN: blood urea nitrogen; HTN: hypertension, DM: diabetes mellitus, CAD: coronary artery disease; CKD: chronic kidney disease; CHF: congestive heart failure; BMI: body mass index; BUN: blood urea nitrogen.

**Table S14: Multivariate analysis evaluating the association of hospital mortality with serum levels of calcium on day 3. Related to table 5.**

| Variable             | OR    | 95% C.I. |       | P value |
|----------------------|-------|----------|-------|---------|
|                      |       | Lower    | Upper |         |
| Age                  | 1.031 | 1.02     | 1.042 | 0.001   |
| Male                 | 1.435 | 1.083    | 1.901 | 0.012   |
| HTN                  | 1.33  | 0.965    | 1.832 | 0.081   |
| DM                   | 0.987 | 0.729    | 1.336 | 0.93    |
| CAD                  | 0.825 | 0.551    | 1.235 | 0.349   |
| CKD                  | 1.162 | 0.702    | 1.924 | 0.559   |
| CHF                  | 1.439 | 0.944    | 2.192 | 0.09    |
| Malignancy           | 0.784 | 0.479    | 1.286 | 0.336   |
| BMI                  | 1.037 | 1.02     | 1.053 | 0.001   |
| Creatinine admission | 0.978 | 0.896    | 1.069 | 0.628   |
| BUN admission        | 1.005 | 0.998    | 1.012 | 0.157   |
| Calcium day 3        | 0.457 | 0.367    | 0.568 | 0.001   |

OR: odds ratio, CI: Confidence Interval, BUN: blood urea nitrogen; HTN: hypertension, DM: diabetes mellitus, CAD: coronary artery disease; CKD: chronic kidney disease; CHF: congestive heart failure; BMI: body mass index; BUN: blood urea nitrogen.

**Table S15: Multivariate analysis evaluating the association of hospital mortality with serum levels of calcium on day 4. Related to table 5.**

| Variable             | OR    | 95% C.I. |       | P value |
|----------------------|-------|----------|-------|---------|
|                      |       | Lower    | Upper |         |
| Age                  | 1.023 | 1.009    | 1.037 | 0.001   |
| Male                 | 1.852 | 1.279    | 2.684 | 0.001   |
| HTN                  | 1.48  | 0.975    | 2.245 | 0.065   |
| DM                   | 0.975 | 0.666    | 1.427 | 0.895   |
| CAD                  | 0.829 | 0.487    | 1.41  | 0.489   |
| CKD                  | 1.446 | 0.789    | 2.652 | 0.233   |
| CHF                  | 1.176 | 0.656    | 2.109 | 0.586   |
| Malignancy           | 1.042 | 0.527    | 2.059 | 0.906   |
| BMI                  | 1.02  | 1        | 1.04  | 0.048   |
| Creatinine admission | 0.926 | 0.839    | 1.022 | 0.125   |
| BUN admission        | 1.009 | 1.001    | 1.017 | 0.032   |
| Calcium day 4        | 0.498 | 0.382    | 0.649 | 0.001   |

OR: odds ratio, CI: Confidence Interval, BUN: blood urea nitrogen; HTN: hypertension, DM: diabetes mellitus, CAD: coronary artery disease; CKD: chronic kidney disease; CHF: congestive heart failure; BMI: body mass index; BUN: blood urea nitrogen.

**Table S16: Multivariate analysis evaluating the association of hospital mortality with serum albumin on admission. Related to table 5.**

| Variable             | OR    | 95% C.I. |       | P value |
|----------------------|-------|----------|-------|---------|
|                      |       | Lower    | Upper |         |
| Age                  | 1.037 | 1.028    | 1.046 | 0.001   |
| Male                 | 1.408 | 1.131    | 1.754 | 0.002   |
| HTN                  | 1.079 | 0.843    | 1.381 | 0.546   |
| DM                   | 0.932 | 0.733    | 1.185 | 0.564   |
| CAD                  | 1.022 | 0.75     | 1.391 | 0.892   |
| CKD                  | 1.11  | 0.753    | 1.637 | 0.598   |
| CHF                  | 1.084 | 0.764    | 1.538 | 0.652   |
| Malignancy           | 1.132 | 0.789    | 1.624 | 0.5     |
| BMI                  | 1.03  | 1.017    | 1.043 | 0.001   |
| Creatinine admission | 0.989 | 0.933    | 1.049 | 0.714   |
| BUN admission        | 1.007 | 1.002    | 1.013 | 0.006   |
| Albumin on admission | 0.442 | 0.364    | 0.537 | 0.001   |

OR: odds ratio, CI: Confidence Interval, BUN: blood urea nitrogen; HTN: hypertension, DM: diabetes mellitus, CAD: coronary artery disease; CKD: chronic kidney disease; CHF: congestive heart failure; BMI: body mass index; BUN: blood urea nitrogen.

**Table S17: Multivariate analysis evaluating the association of hospital mortality with serum albumin on day 1. Related to table 5.**

| Variable             | OR    | 95% C.I. |       | P value |
|----------------------|-------|----------|-------|---------|
|                      |       | Lower    | Upper |         |
| Age                  | 1.036 | 1.025    | 1.048 | 0.001   |
| Male                 | 1.383 | 1.021    | 1.875 | 0.036   |
| HTN                  | 0.957 | 0.68     | 1.346 | 0.799   |
| DM                   | 0.998 | 0.717    | 1.388 | 0.988   |
| CAD                  | 0.962 | 0.622    | 1.486 | 0.86    |
| CKD                  | 0.805 | 0.461    | 1.407 | 0.447   |
| CHF                  | 1.262 | 0.769    | 2.071 | 0.358   |
| Malignancy           | 1.403 | 0.831    | 2.371 | 0.205   |
| BMI                  | 1.045 | 1.028    | 1.063 | 0.001   |
| Creatinine admission | 1.074 | 0.986    | 1.17  | 0.101   |
| BUN admission        | 1.002 | 0.995    | 1.009 | 0.6     |
| Albumin on day 1     | 0.401 | 0.302    | 0.532 | 0.001   |

OR: odds ratio, CI: Confidence Interval, BUN: blood urea nitrogen; HTN: hypertension, DM: diabetes mellitus, CAD: coronary artery disease; CKD: chronic kidney disease; CHF: congestive heart failure; BMI: body mass index; BUN: blood urea nitrogen.

**Table S18: Multivariate analysis evaluating the association of hospital mortality with serum albumin on day 2. Related to table 5.**

| Variable             | OR    | 95% C.I. |       | P value |
|----------------------|-------|----------|-------|---------|
|                      |       | Lower    | Upper |         |
| Age                  | 1.041 | 1.028    | 1.054 | 0.001   |
| Male                 | 1.651 | 1.202    | 2.269 | 0.002   |
| HTN                  | 1.18  | 0.825    | 1.689 | 0.365   |
| DM                   | 0.902 | 0.644    | 1.263 | 0.548   |
| CAD                  | 0.885 | 0.559    | 1.401 | 0.601   |
| CKD                  | 1.24  | 0.724    | 2.125 | 0.433   |
| CHF                  | 1.172 | 0.73     | 1.881 | 0.512   |
| Malignancy           | 1.047 | 0.606    | 1.809 | 0.87    |
| BMI                  | 1.044 | 1.026    | 1.063 | 0.001   |
| Creatinine admission | 1.012 | 0.93     | 1.101 | 0.782   |
| BUN admission        | 1.001 | 0.993    | 1.008 | 0.884   |
| Albumin on day 2     | 0.293 | 0.216    | 0.397 | 0.001   |

OR: odds ratio, CI: Confidence Interval, BUN: blood urea nitrogen; HTN: hypertension, DM: diabetes mellitus, CAD: coronary artery disease; CKD: chronic kidney disease; CHF: congestive heart failure; BMI: body mass index; BUN: blood urea nitrogen.

**Table S19: Multivariate analysis evaluating association of hospital mortality with serum levels of albumin on day 3. Related to table 5.**

| Variable             | OR    | 95% C.I. |       | P value |
|----------------------|-------|----------|-------|---------|
|                      |       | Lower    | Upper |         |
| Age                  | 1.042 | 1.029    | 1.055 | 0.001   |
| Male                 | 1.458 | 1.052    | 2.02  | 0.023   |
| HTN                  | 1.154 | 0.802    | 1.661 | 0.44    |
| DM                   | 0.854 | 0.602    | 1.211 | 0.375   |
| CAD                  | 1.024 | 0.642    | 1.633 | 0.922   |
| CKD                  | 0.767 | 0.431    | 1.364 | 0.367   |
| CHF                  | 0.865 | 0.503    | 1.487 | 0.6     |
| Malignancy           | 1.063 | 0.612    | 1.848 | 0.828   |
| BMI                  | 1.044 | 1.026    | 1.062 | 0.001   |
| Creatinine admission | 1.069 | 0.977    | 1.169 | 0.145   |
| BUN admission        | 1.003 | 0.995    | 1.011 | 0.512   |
| Albumin on day 3     | 0.366 | 0.268    | 0.501 | 0.001   |

OR: odds ratio, CI: Confidence Interval, BUN: blood urea nitrogen; HTN: hypertension, DM: diabetes mellitus, CAD: coronary artery disease; CKD: chronic kidney disease; CHF: congestive heart failure; BMI: body mass index; BUN: blood urea nitrogen.

**Table S20: Multivariate analysis evaluating association of hospital mortality with serum levels of albumin on day 4. Related to table 5.**

| Variable             | OR    | 95% C.I. |       | P value |
|----------------------|-------|----------|-------|---------|
|                      |       | Lower    | Upper |         |
| Age                  | 1.039 | 1.025    | 1.053 | 0.001   |
| Male                 | 1.457 | 1.021    | 2.078 | 0.038   |
| HTN                  | 1.148 | 0.768    | 1.717 | 0.5     |
| DM                   | 0.779 | 0.535    | 1.134 | 0.193   |
| CAD                  | 1.091 | 0.651    | 1.83  | 0.74    |
| CKD                  | 1.205 | 0.639    | 2.272 | 0.564   |
| CHF                  | 0.737 | 0.4      | 1.357 | 0.327   |
| Malignancy           | 0.84  | 0.435    | 1.62  | 0.602   |
| BMI                  | 1.035 | 1.016    | 1.054 | 0.001   |
| Creatinine admission | 1.02  | 0.922    | 1.129 | 0.699   |
| BUN admission        | 0.999 | 0.99     | 1.008 | 0.838   |
| Albumin on day 3     | 0.327 | 0.232    | 0.46  | 0.001   |

OR: odds ratio, CI: Confidence Interval, BUN: blood urea nitrogen; HTN: hypertension, DM: diabetes mellitus, CAD: coronary artery disease; CKD: chronic kidney disease; CHF: congestive heart failure; BMI: body mass index; BUN: blood urea nitrogen.



**TABLE S21: Cytokine profile of ICU patients comparing COVID versus non-COVID patients (left side) as well as animal experiment comparing control mice versus mice treated with linoleic acid (right side), related to table 6.**

| Variable               | Non-COVID, Non-Septic shock (49) | COVID-19 (39)      | P value | Control mice     | Linoleic acid mice  | P value |
|------------------------|----------------------------------|--------------------|---------|------------------|---------------------|---------|
| GRO $\alpha$ (pg/ml)   | 12.6 (5.1-27.1)                  | 35 (18.6-53.8)     | <0.001  | 685 (480-1018)   | 65034 (63915-67163) | 0.001   |
| IL-1 $\beta$ (pg/ml)   | 0 (0-5.1)                        | 8.3 (4.6-16.5)     | <0.001  | 8.5 (1.2-19.0)   | 26.8 (15.8-46.8)    | 0.01    |
| IL-1R $\alpha$ (pg/ml) | 4.8 (2.6-12.9)                   | 22.4 (9.1-53.1)    | <0.001  |                  |                     |         |
| IL-4 (pg/ml)           | 2.3 (0-6.4)                      | 4.7 (1.4-6.9)      | 0.03    | 5.0 (0.6-8.1)    | 7.5 (5.6-7.5)       | 0.34    |
| IL-6 (pg/ml)           | 143.8 (33.2-357.1)               | 360 (67-641)       | 0.006   | 22.8 (3.1-155)   | 5828 (4383-11758)   | 0.001   |
| IL-18 (pg/ml)          | 32.8 (19.6-47.4)                 | 119.4 (86.4-174.2) | <0.001  |                  |                     |         |
| IP-10 (pg/ml)          | 175 (103-285)                    | 3204 (1956-3941)   | < 0.001 | 576 (446-783)    | 926 (573-1318)      | 0.23    |
| MCP-1 (pg/ml)          | 561 (397-752)                    | 1336 (892-1836)    | < 0.001 | 126 (59-339)     | 2350 (1993-2526)    | 0.001   |
| TNF $\alpha$ (pg/ml)   | 13 (5.5-23.4)                    | 40.4 (28.3-58.4)   | < 0.001 | 25.0 (13.7-43.5) | 120 (108-127)       | 0.001   |

**TABLE S22: Outcomes and interventions of 88 patients admitted to the ICU comparing COVID versus non-COVID, non-septic patients, related to table 7.**

| Variable                                   | Non-COVID, Non-Septic shock (49) | COVID-19 (39)    | P value  |
|--------------------------------------------|----------------------------------|------------------|----------|
| Multiorgan failure, n (%)                  | 17 (35)                          | 23 (59)          | 0.02     |
| Renal Replacement Therapy, n (%)           | 3 (6)                            | 9 (23)           | 0.02     |
| Veno-venous ECMO, n (%)                    | 1 (2)                            | 10 (26)          | 0.001    |
| ICU Mortality, n (%)                       | 2 (4)                            | 5 (12.8)         | 0.23     |
| Mechanical ventilation days, median (IQR)  | 0.35 (0.24-0.60)                 | 25.8 (9.4-44.9)  | < 0.0001 |
| ICU length of stay days, median (IQR)      | 2.1 (1-3.2)                      | 14.5 (5.6-34.6)  | < 0.0001 |
| Hospital length of stay days, median (IQR) | 6.9 (5.1-12.7)                   | 22.9 (10.7-42.2) | < 0.0001 |
| 28 Day Mortality, n (%)                    | 2 (4)                            | 5 (12.8)         | 0.23     |
| DVT or PE events                           | 1 (2)                            | 10 (26)          | 0.002    |

ICU: intensive care unit, IQR: interquartile range, ECMO: extracorporeal membrane oxygenation, DVT: deep venous thrombosis, PE: pulmonary embolism

**TABLE S23: Clinical characteristics, fatty acid profile, cytokine profile, and outcomes of 70 patients without diabetes admitted to the ICU comparing COVID versus non-COVID patients, related to tables 2, 3, 6 and 7.**

| Variable                                | Non-COVID (50)      | COVID-19 (20)      | P value |
|-----------------------------------------|---------------------|--------------------|---------|
| Age in years, median (IQR)              | 67 (54-75)          | 49 (42-59)         | 0.0002  |
| Female sex, n (%)                       | 16 (32)             | 8 (40)             | 0.58    |
| BMI in Kg/m <sup>2</sup> , median (IQR) | 27.3 (23.4-31.8)    | 31.8 (27.6-39.3)   | 0.003   |
| Caucasians, n (%)                       | 45 (90)             | 5 (25)             | <0.0001 |
| Hypertension, n (%)                     | 19 (38)             | 3 (15)             | 0.08    |
| Coronary artery disease, n (%)          | 16 (32)             | 0 (0)              | 0.003   |
| Cancer, n (%)                           | 6 (12)              | 2 (10)             | 0.99    |
| Cerebrovascular disease, n (%)          | 9 (18)              | 0 (0)              | 0.052   |
| Cirrhosis, n (%)                        | 4 (8)               | 0 (0)              | 0.32    |
| Chronic kidney disease, n (%)           | 6 (12)              | 1 (5)              | 0.66    |
| Immunosuppression, n (%)                | 5 (10)              | 1 (5)              | 0.66    |
| Mechanical Ventilation, n (%)           | 30 (60)             | 12 (60)            | 0.99    |
| Acute physiologic score, median (IQR)   | 42.5 (31-55.2)      | 35 (22-55.2)       | 0.21    |
| APACHE IV, median (IQR)                 | 56 (39-74)          | 40 (32-64)         | 0.03    |
| Predicted mortality, median (IQR)       | 6.6 (1.5-25.8)      | 10.6 (5.8-26.8)    | 0.14    |
| Vasopressors on Day 1                   | 31 (62)             | 10 (50)            | 0.42    |
| Lipase (U/L), median (IQR)              | 22 (11-43)          | 87 (48-144)        | <0.0001 |
| Albumin (g/dL), median (IQR)            | 4 (3.2-4.1)         | 3.2 (2.9-3.4)      | 0.001   |
| Calcium (mg/dL), median (IQR)           | 8.4 (7.8-9)         | 8 (7.5-8.2)        | 0.01    |
| Ionized Calcium (mg/dL), median (IQR)   | 4.6 (4.3-5)         | 4.3 (4.1-4.6)      | 0.01    |
| <b>FATTY ACID PROFILE</b>               |                     |                    |         |
| Myristic acid (μM)(IQR)                 | 8.4 (6.3-10.7)      | 6.8 (5.5-11.1)     | 0.64    |
| Palmitic acid(μM)(IQR)                  | 135.3 (113.3-178.2) | 189 (115-238.4)    | 0.04    |
| Palmitoleic acid (μM)(IQR)              | 16 (11-23)          | 19 (12-27)         | 0.3     |
| Stearic acid (μM)(IQR)                  | 48 (38-55)          | 49 (38-59)         | 0.67    |
| Oleic acid(μM)(IQR)                     | 228 (174-273)       | 277 (193-371)      | 0.08    |
| Linoleic acid(μM)(IQR)                  | 84 (58-108)         | 134 (85-171)       | 0.0006  |
| Arachidonic acid(μM)(IQR)               | 3.6 (3-5.2)         | 5 (3.6-5.7)        | 0.009   |
| NEFA(μM)(IQR)                           | 539 (398-640)       | 689 (471-920)      | 0.05    |
| UFA(μM)(IQR)                            | 341 (250-403)       | 461 (320-600)      | 0.03    |
| SFA(μM)(IQR)                            | 189 (166-241)       | 251 (162-331)      | 0.11    |
| %UFA                                    | 62.5 (60.2-64.4)    | 64 (62.5-66)       | 0.03    |
| Unbound FA (μM)(IQR)                    | 3.48 (2.72-5.2)     | 5.2 (2.32-9.12)    | 0.13    |
| <b>CYTOKINES</b>                        |                     |                    |         |
| GROα (pg/ml)                            | 19.2 (4.9-33.2)     | 38.6 (20.7-62.3)   | 0.007   |
| IL-1β (pg/ml)                           | 2.7 (0-14.2)        | 9.2 (3.7-16)       | 0.06    |
| IL-1Rα (pg/ml)                          | 7.8 (2.8-32.5)      | 32.9 (11.2-52.6)   | 0.004   |
| IL-4 (pg/ml)                            | 2.5 (0-6.3)         | 4.6 (1.8-6.9)      | 0.13    |
| IL-6 (pg/ml)                            | 125 (32-422)        | 426 (90-1125)      | 0.01    |
| IL-18 (pg/ml)                           | 53.4 (23.6-153.2)   | 135.7 (77.6-176-7) | 0.17    |
| IP-10 (pg/ml)                           | 228 (119-564)       | 3322 (2095-4060)   | <0.0001 |
| MCP-1 (pg/ml)                           | 560 (381-1034)      | 1324 (1051-2094)   | 0.0002  |
| TNFα (pg/ml)                            | 16 (6-38.5)         | 39.4 (27.9-70.4)   | 0.002   |

| <b>OUTCOMES</b>                            |                |                  |         |
|--------------------------------------------|----------------|------------------|---------|
| Multiorgan failure, n (%)                  | 19 (38)        | 11 (60)          | 0.11    |
| Renal Replacement Therapy, n (%)           | 3 (6)          | 4 (20)           | 0.09    |
| Veno-venous ECMO, n (%)                    | 1 (2)          | 5 (25)           | 0.007   |
| ICU Mortality, n (%)                       | 3 (6)          | 2 (10)           | 0.62    |
| Mechanical ventilation days, median (IQR)  | 0.4 (0.2-3.3)  | 20 (9-56)        | <0.0001 |
| ICU length of stay days, median (IQR)      | 2.2 (1.1-4.1)  | 13.2 (3.3-44.7)  | <0.0001 |
| Hospital length of stay days, median (IQR) | 7.4 (5.1-14.9) | 20.7 (10.6-54.3) | 0.0004  |
| 28 Day Mortality, n (%)                    | 3 (6)          | 2 (10)           | 0.61    |
| DVT or PE events, n (%)                    | 3 (6)          | 5 (25)           | 0.03    |

**TABLE S24: Clinical characteristics, fatty acid profile, cytokine profile, and outcomes of 76 male patients admitted to the ICU comparing COVID versus non-COVID patients, related to tables 2, 3, 6 and 7.**

| Variable                                | Non-COVID (54)    | COVID-19 (22)      | P value |
|-----------------------------------------|-------------------|--------------------|---------|
| Age in years, median (IQR)              | 71 (61-77)        | 54 (44-63)         | <0.0001 |
| BMI in Kg/m <sup>2</sup> , median (IQR) | 27.5 (25-32.5)    | 28.8 (26.3-33.7)   | 0.31    |
| Caucasians, n (%)                       | 49 (91)           | 6 (27)             | <0.0001 |
| Diabetes Mellitus, n (%)                | 20 (37)           | 10 (45)            | 0.61    |
| Hypertension, n (%)                     | 25 (46)           | 6(27)              | 0.19    |
| Coronary artery disease, n (%)          | 23 (43)           | 3 (14)             | 0.01    |
| Cancer, n (%)                           | 10 (19)           | 1 (5)              | 0.16    |
| Cerebrovascular disease, n (%)          | 3 (6)             | 2 (9)              | 0.62    |
| Cirrhosis, n (%)                        | 4 (7)             | 0(0)               | 0.31    |
| Chronic kidney disease, n (%)           | 9 (17)            | 2 (9)              | 0.49    |
| Immunosuppression, n (%)                | 4 (7)             | 2 (9)              | 0.99    |
| Acute physiologic score, median (IQR)   | 46.5 (33-61)      | 37.5 (22-57)       | 0.11    |
| APACHE IV, median (IQR)                 | 61 (47-83)        | 47 (29-66)         | 0.01    |
| Predicted mortality, median (IQR)       | 2.3 (1.3-25.2)    | 11.7 (6.2-26)      | 0.1     |
| Vasopressors on Day 1                   | 39 (72)           | 9 (41)             | 0.01    |
| Lipase (U/L), median (IQR)              | 20 (9-35)         | 73 (42-124)        | <0.0001 |
| Albumin (g/dL), median (IQR)            | 4 (3.2-4.1)       | 3.2 (2.6-3.4)      | 0.0003  |
| Calcium (mg/dL), median (IQR)           | 8.3 (7.9-9)       | 7.8 (7.4-8.2)      | 0.001   |
| Ionized Calcium (mg/dL), median (IQR)   | 4.5 (4.2-4.8)     | 4.4 (4.3-4.7)      | 0.26    |
| <b>FATTY ACID PROFILE</b>               |                   |                    |         |
| Myristic acid (μM)(IQR)                 | 7.9 (5.6-11.3)    | 6.6 (4.8-9.2)      | 0.09    |
| Palmitic acid(μM)(IQR)                  | 135 (113-180)     | 164 (111-217)      | 0.25    |
| Palmitoleic acid (μM)(IQR)              | 13.7 (8.6-22.9)   | 15.1 (7.1-20.7)    | 0.87    |
| Stearic acid (μM)(IQR)                  | 50.3 (39.6-56.7)  | 48.4 (43.1-57.4)   | 0.99    |
| Oleic acid(μM)(IQR)                     | 220 (159-275)     | 232 (176-316)      | 0.48    |
| Linoleic acid(μM)(IQR)                  | 82.3 (60.8-109.7) | 116.5 (79.8-146.7) | 0.01    |
| Arachidonic acid(μM)(IQR)               | 3.9 (3-4.8)       | 5.3 (3.6-6.2)      | 0.009   |
| NEFA(μM)(IQR)                           | 535 (397-674)     | 578 (438-811)      | 0.31    |
| UFA(μM)(IQR)                            | 333 (241-413)     | 360 (265-514)      | 0.25    |
| SFA(μM)(IQR)                            | 192 (163-245)     | 223 (160-277)      | 0.39    |
| %UFA                                    | 61.5 (60-64)      | 62.7 (60-66)       | 0.22    |
| Unbound FA (μM)(IQR)                    | 3.5 (2.8-5.4)     | 4.7 (2.1-8.1)      | 0.32    |
| <b>CYTOKINES</b>                        |                   |                    |         |
| GROα (pg/ml)                            | 17 (6.8-29.6)     | 25.5 (15.7-47.3)   | 0.04    |
| IL-1β (pg/ml)                           | 2.7 (0-17.2)      | 10.6 (5.5-18.4)    | 0.04    |
| IL-1Rα (pg/ml)                          | 8.6 (3.7-116)     | 21.6 (9.2-43.4)    | 0.11    |
| IL-4 (pg/ml)                            | 3 (0-6.4)         | 4.7 (1.7-7.9)      | 0.14    |
| IL-6 (pg/ml)                            | 172 (71-430)      | 358 (147-716)      | 0.01    |
| IL-18 (pg/ml)                           | 49 (23.6-107.4)   | 140 (98.4-187)     | 0.009   |
| IP-10 (pg/ml)                           | 198 (120-380)     | 3577 (1515-4074)   | <0.0001 |
| MCP-1 (pg/ml)                           | 645 (415-913)     | 1473 (989-2579)    | <0.0001 |
| TNFα (pg/ml)                            | 21.2 (6.5-61)     | 41 (28.3-76.7)     | 0.009   |

| <b>OUTCOMES</b>                            |               |                  |         |
|--------------------------------------------|---------------|------------------|---------|
| Multiorgan failure, n (%)                  | 22 (41)       | 13 (59)          | 0.2     |
| Renal Replacement Therapy, n (%)           | 6 (11)        | 4 (18)           | 0.46    |
| Veno-venous ECMO, n (%)                    | 1 (2)         | 3 (14)           | 0.04    |
| ICU Mortality, n (%)                       | 5 (9)         | 3 (14)           | 0.68    |
| Mechanical ventilation days, median (IQR)  | 0.4 (0.2-0.8) | 20.3 (8.9-38.8)  | <0.0001 |
| ICU length of stay days, median (IQR)      | 2.1 (1.2-3.5) | 14.2 (4.6-27.7)  | <0.0001 |
| Hospital length of stay days, median (IQR) | 7 (5.1-12)    | 22.8 (11.3-34.5) | <0.0001 |
| 28 Day Mortality, n (%)                    | 6 (11)        | 3 (14)           | 0.71    |
| DVT or PE events, n (%)                    | 1 (2)         | 7 (32)           | 0.0005  |
